# Supplementary material
Source: PubMed Central journal article supplement (PMC2518062)

**Supporting Figure 1.** (A) Comparison of relative  $k_{cat}/K_m$  values for hs mt tRNA<sup>Leu(UUR)</sup> with WT and mutant hs mt (gray) and *E. coli* LeuRSs (black). (B) Comparison of relative  $k_{cat}/K_m$  for *E. coli* tRNA<sup>Leu(CUN)</sup> with WT and mutant hs mt (gray) and *E. coli* LeuRSs (black). (Inset) Relative  $k_{cat}/K_m$  comparison of wild-type hs mt LeuRS to the hs mt K600 mutants with *E. coli* tRNA<sup>Leu(CUN)</sup> alone. Relative numbers were derived from corresponding WT enzymes.

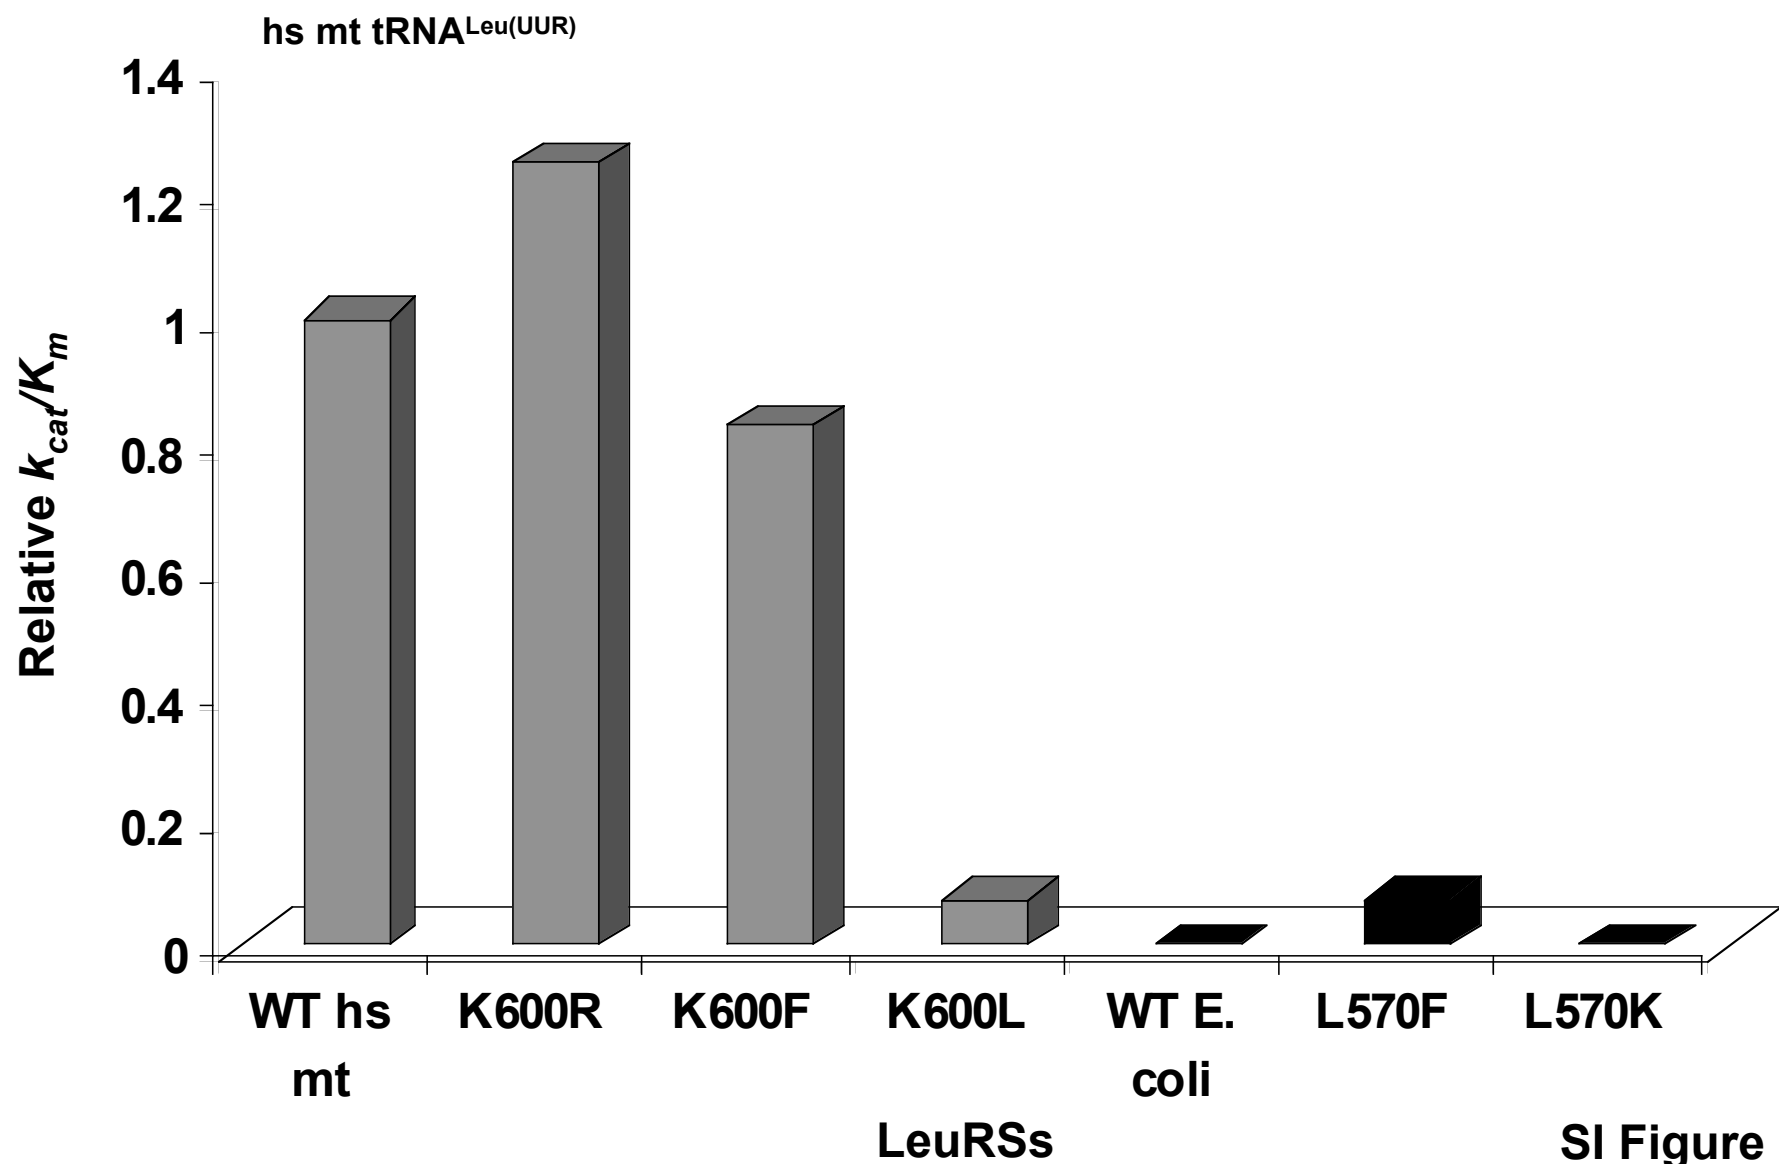

SI Figure 1B

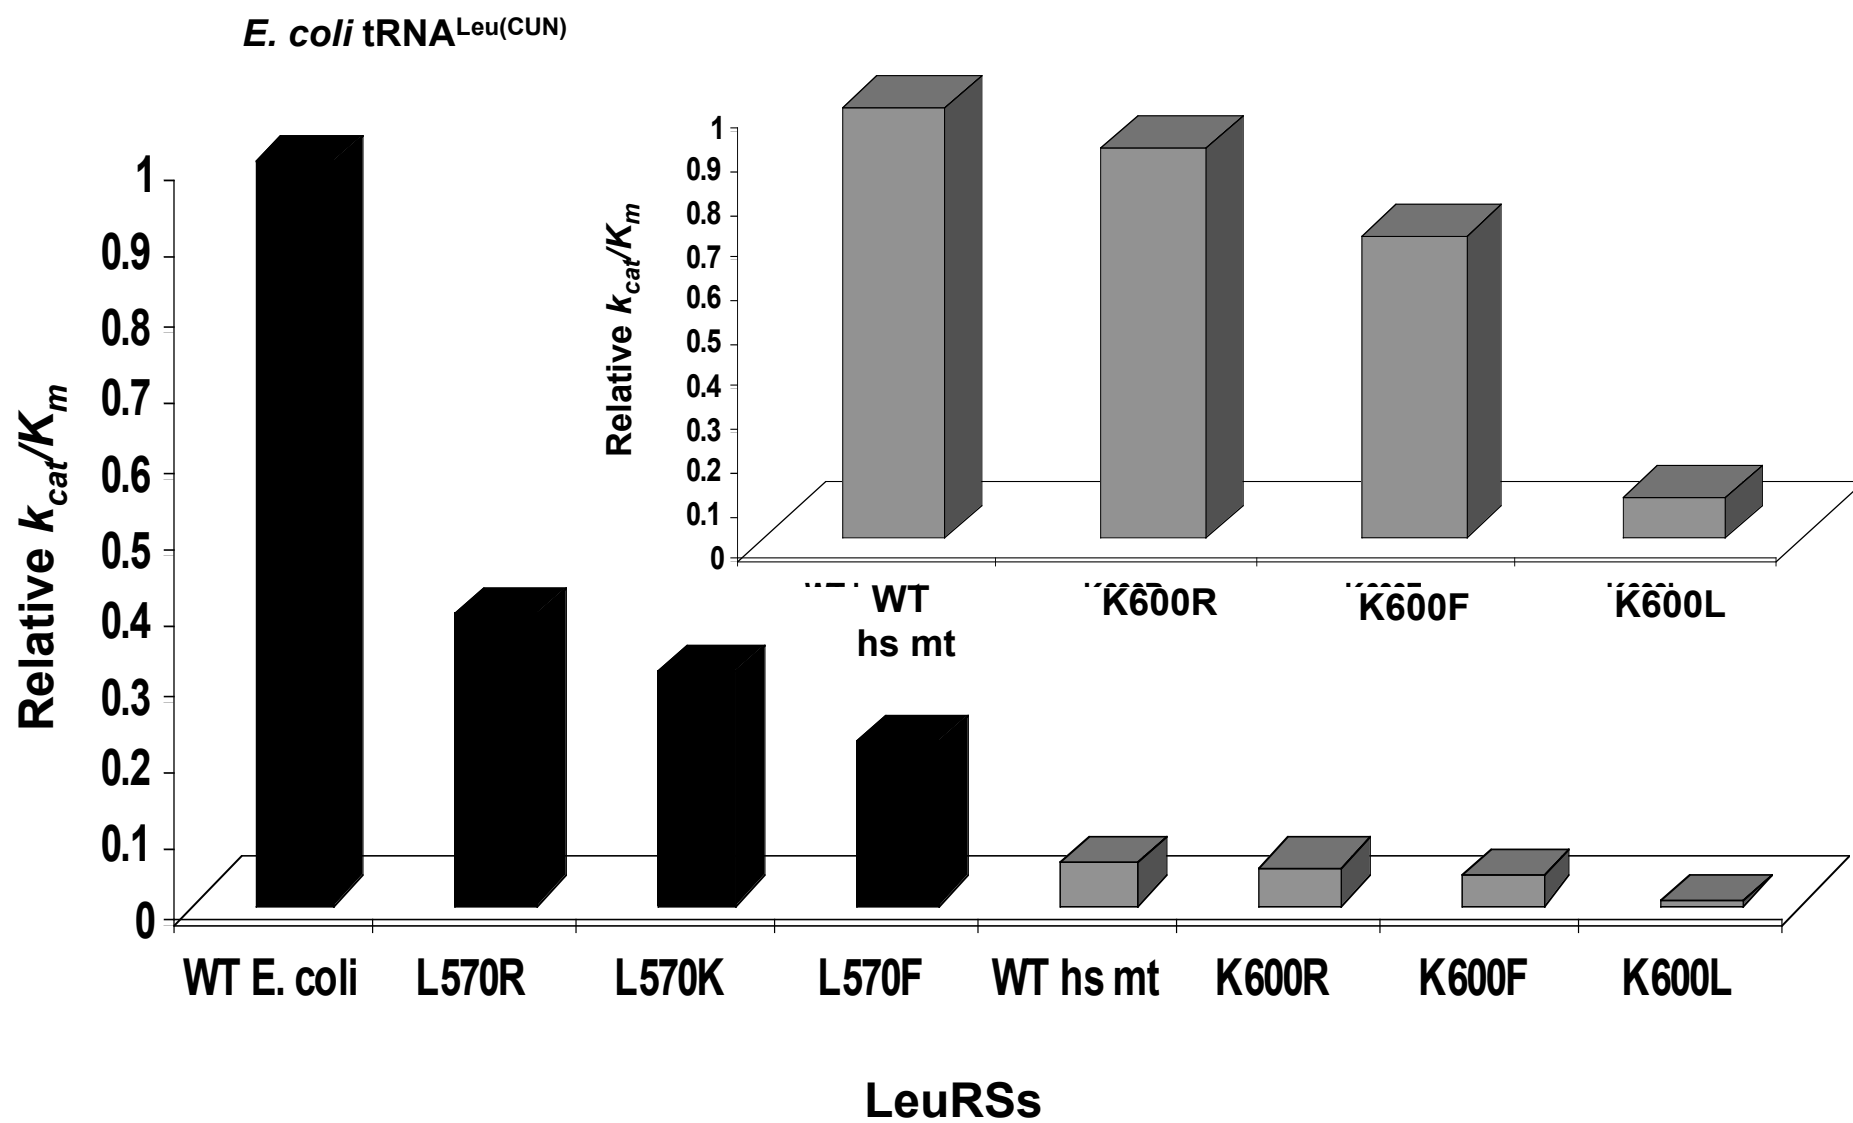

Supplement: NIHMS62084-supplement-File002.pdf [file NIHMS62084-supplement-File002.pdf]
