# Supplementary material
Source: PubMed Central journal article supplement (PMC2518062)

**Supporting Figure 1.** (A) Comparison of relative  $k_{cat}/K_m$ s for leucine and isoleucine and relative discrimination ratios for hs mt mutants K600L, K600R and K600F. (B) Comparison of relative  $k_{cat}/K_m$ s for leucine and isoleucine and relative discrimination ratios for *E. coli* mutants L570K, L570R and L570F. Relative  $k_{cat}/K_m$  values are represented for leucine (gray), relative  $k_{cat}/K_m$  for isoleucine (black) and relative discrimination ratios (white) respectively. Relative numbers were derived from corresponding WT enzymes.

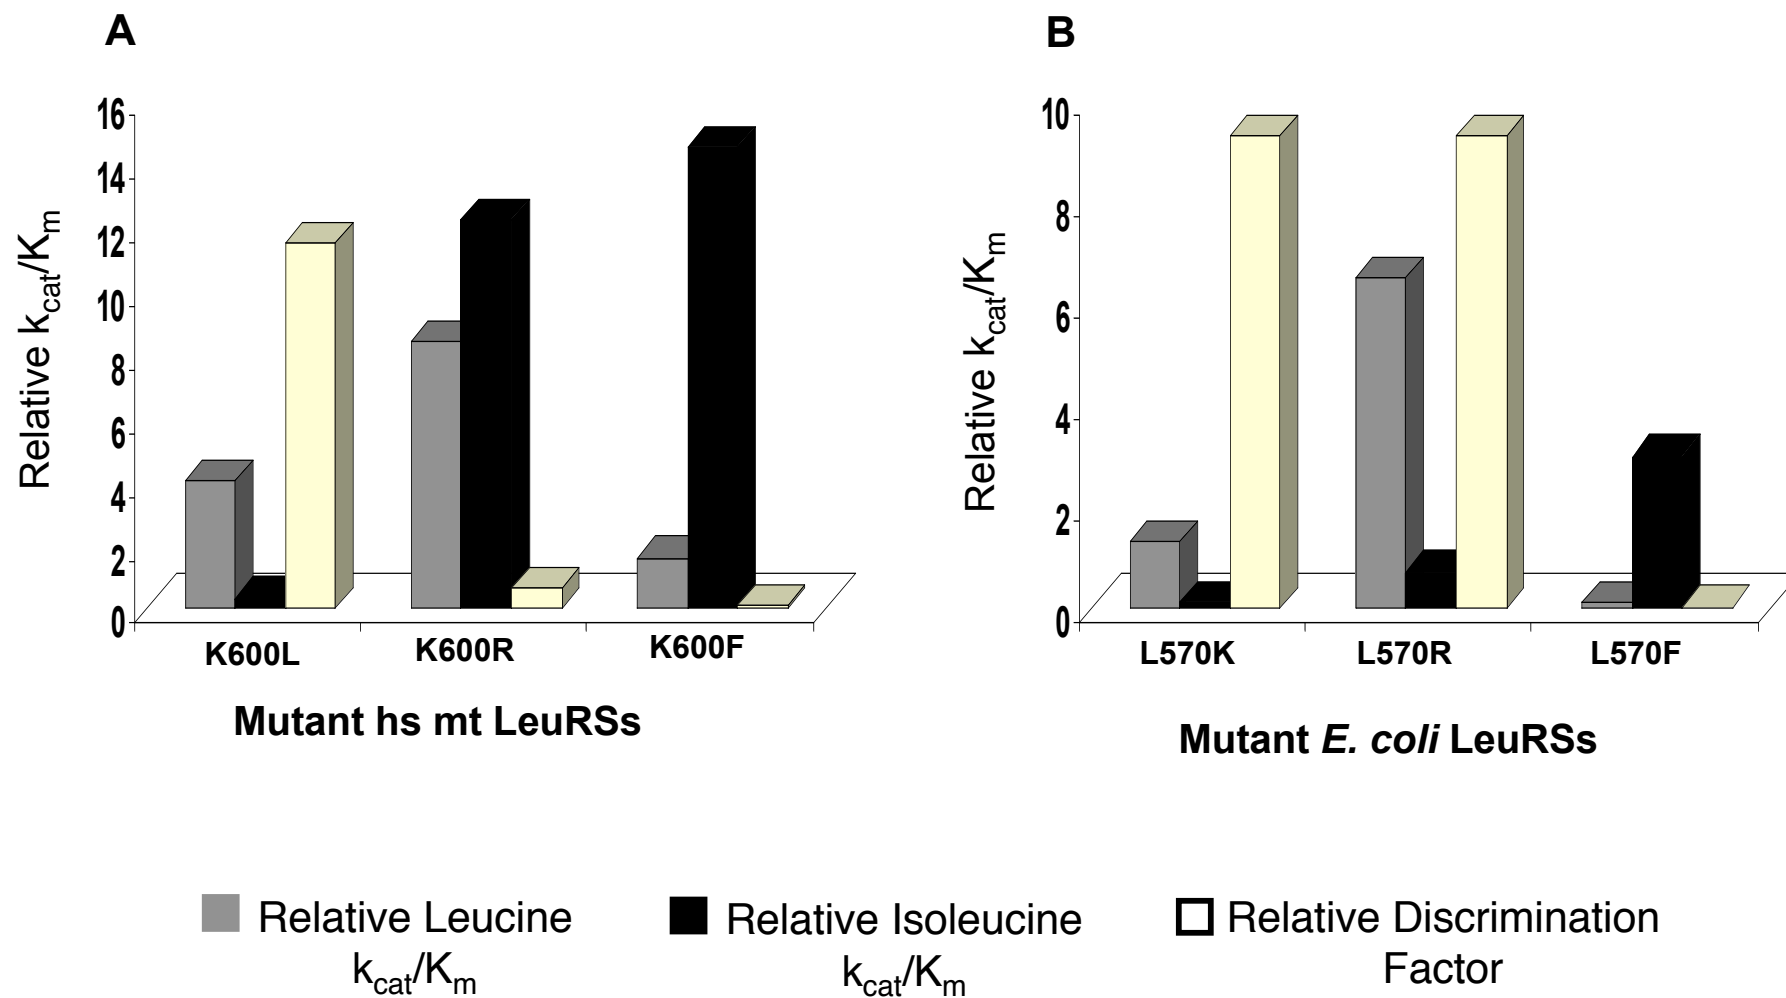

**Supporting Figure 2.** (A) Comparison of relative  $k_{cat}/K_m$  values for hs mt tRNA<sup>Leu(UUR)</sup> with WT and mutant hs mt (gray) and *E. coli* LeuRSs (black). (B) Comparison of relative  $k_{cat}/K_m$  for *E. coli* tRNA<sup>Leu(CUN)</sup> with WT and mutant hs mt (gray) and *E. coli* LeuRSs (black). (*Inset*) Relative  $k_{cat}/K_m$  comparison of wild-type hs mt LeuRS to the hs mt K600 mutants with *E. coli* tRNA<sup>Leu(CUN)</sup> alone. Relative numbers were derived from corresponding WT enzymes.

hs mt tRNA<sup>Leu(UUR)</sup>

Relative  $k_{cat}/K_m$

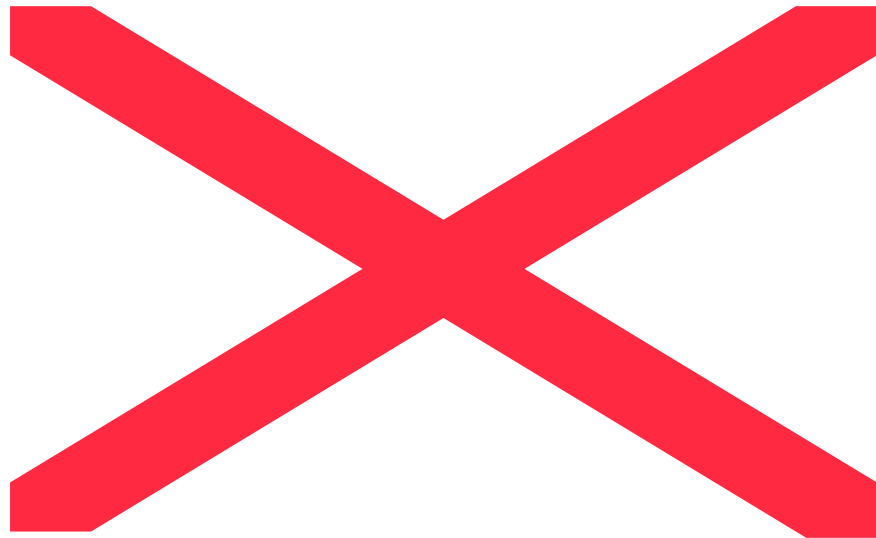

LeuRSs

SI Figure 2A

SI Figure 2B

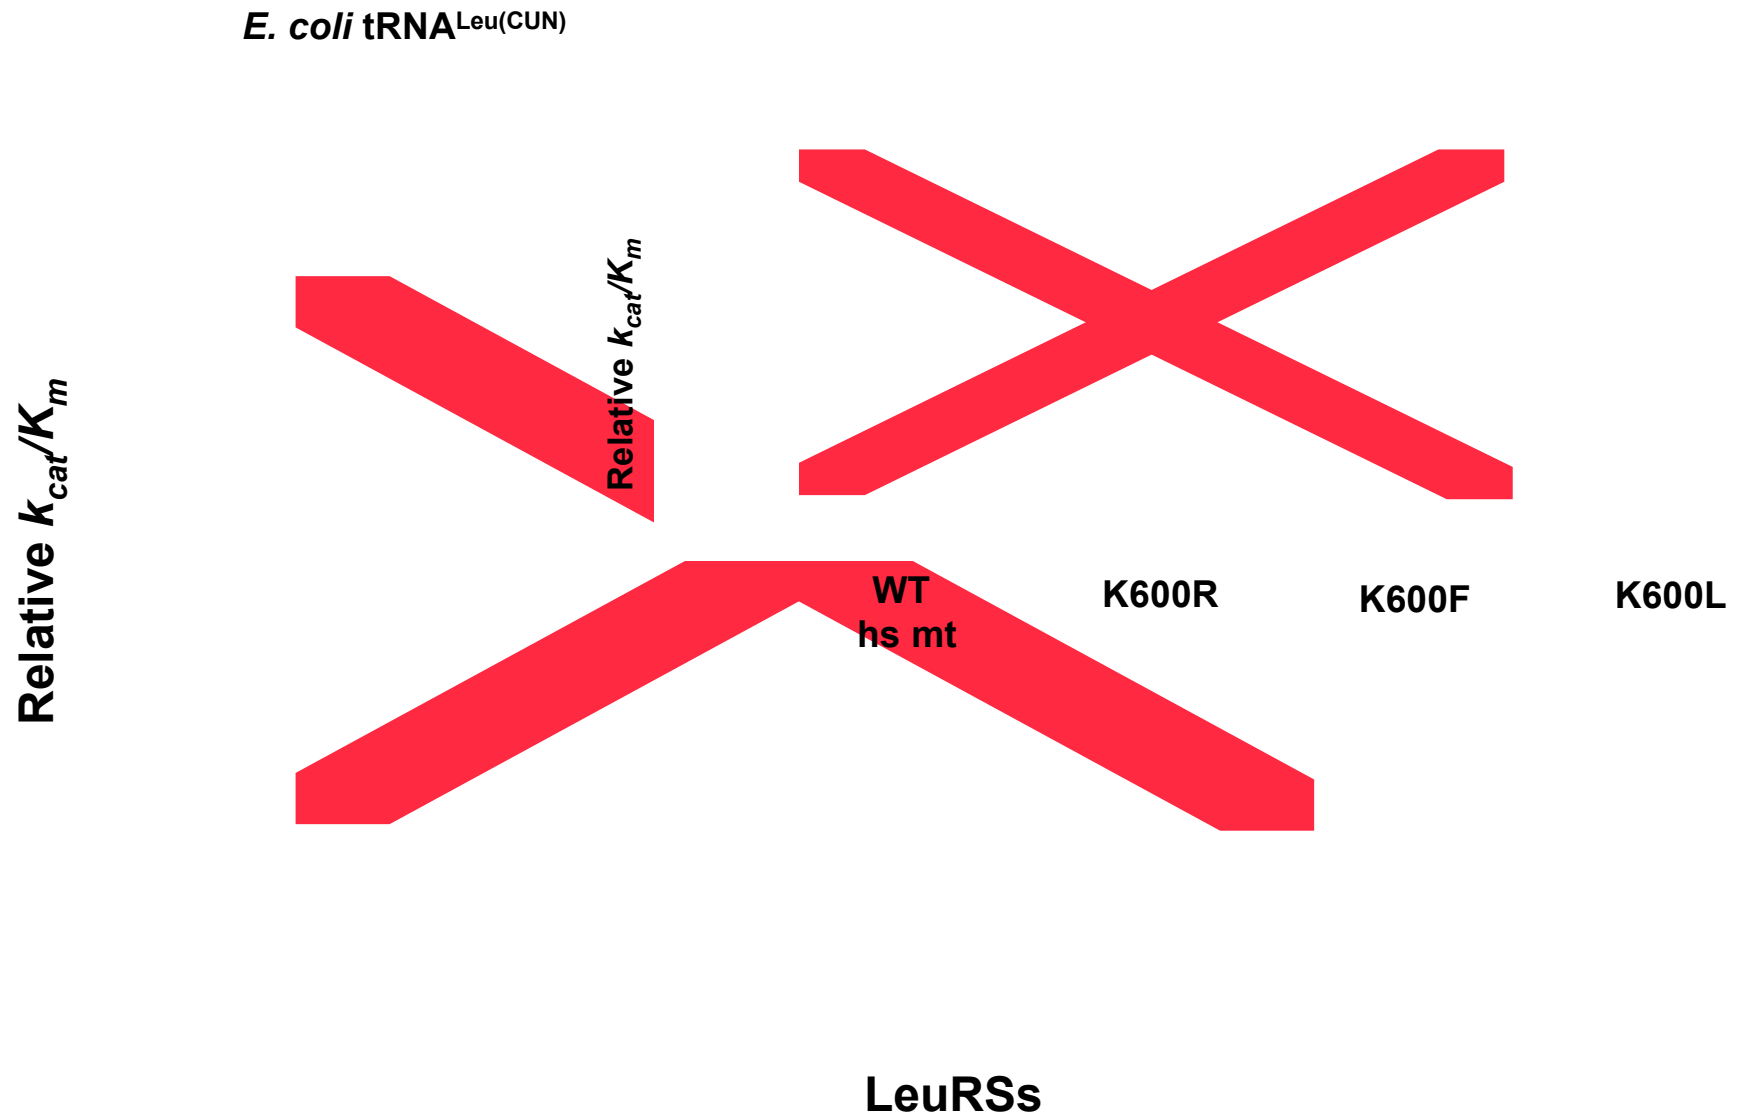

Supplement: NIHMS62084-supplement-si20060831_043.pdf [file NIHMS62084-supplement-si20060831_043.pdf]
